# Supplementary material for: Association between Physical Activity and Health Outcomes (High Body Fatness, High Blood Pressure) in Namibian Adolescents and Adult women
Source: MDPI journal article supplement (doi:10.3390/ijerph21040446), 2024-04-05
Supplement: s1 [file s1]

**Supplementary Table S1: PACE+ variables and descriptive information**

| <b>PACE+ variables</b>                                                                                                                                                                                                          | <b>Responses</b>                                                                                                                                                                                                 | <b>Yes, n (%)</b>                                                                                          |
|---------------------------------------------------------------------------------------------------------------------------------------------------------------------------------------------------------------------------------|------------------------------------------------------------------------------------------------------------------------------------------------------------------------------------------------------------------|------------------------------------------------------------------------------------------------------------|
| How long does it usually take you to travel to school from your home?                                                                                                                                                           | Less than 5 minutes<br>5-15 minutes<br>15-30 minutes<br>30 minutes to 1 hour<br>More than 1 hour                                                                                                                 | 62(30.1)<br>0 (0.0)<br>10(4.9)<br>68(33.0)<br>66(32.0)                                                     |
| How many hours a day, in your free time, do you usually spend watching TV, videos (including YouTube or similar services), DVDs, and other entertainment on a screen? Weekdays / Weekend.                                       | None at all<br>About half an hour a day<br>About 1 hour a day<br>About 2 hours a day<br>About 3 hours a day<br>About 4 hours a day<br>About 5 hours a day<br>About 6 hours a day<br>About 7 or more hours a day) | 12(5.8)<br>17(8.3)<br>18 (8.7)<br>34 (16.5)<br>46 (22.3)<br>30 (14.6)<br>22 (10.7)<br>11 (5.3)<br>16 (7.7) |
| How many hours a day, in your free time, do you usually spend playing games on a computer, games console, tablet (like iPad), smartphone or other electronic device (not including moving or fitness games)? Weekdays / Weekend | None at all<br>About half an hour a day<br>About 1 hour a day<br>About 2 hours a day<br>About 3 hours a day<br>About 4 hours a day<br>About 5 hours a day<br>About 6 hours a day<br>About 7 or more hours a day) | 86 (41.7)<br>38 (18.4)<br>32 (15.5)<br>21 (10.2)<br>12 (5.8)<br>9 (4.4)<br>5 (2.4)<br>1 (0.5)<br>2(1.0)    |

**Supplementary Table S2: GPAQ variables and descriptive information**

| <b>GPAQ variables</b>                                                                                                                                                                                               | <b>Yes, n (%)</b> | <b>No, n (%)</b> | <b>Mean (SD)</b> |
|---------------------------------------------------------------------------------------------------------------------------------------------------------------------------------------------------------------------|-------------------|------------------|------------------|
| Does your work involve vigorous-intensity activity that causes large increases in breathing or heart rate like [carrying or lifting heavy loads, digging or construction work] for at least 10 minutes continuously | 3(1.4)            | 204 (98.6)       | N/A              |
| In a typical week, on how many days do you do vigorous-intensity activities as part of your work? (days/week)                                                                                                       | N/A               | N/A              | 3(2.0)           |
| How much time do you spend doing vigorous-intensity activities at work on a typical day? (hours/day)                                                                                                                | N/A               | N/A              | 1.7(1.2)         |
| Does your work involve moderate-intensity activity, that causes small increases in breathing or heart rate such as brisk walking [or carrying light loads] for at least 10 minutes continuously?                    | 29(14.0)          | 178(86.0)        | N/A              |
| In a typical week, on how many days do you do moderate-intensity activities as part of your work? (days/week)                                                                                                       | N/A               | N/A              | 2.8(2.0)         |
| How much time do you spend doing moderate-intensity activities at work on a typical day? (hours/day)                                                                                                                | N/A               | N/A              | 2.5 (2.6)        |
| Do you walk or use a bicycle (pedal cycle) for at least 10 minutes continuously to get to and from places?                                                                                                          | 113 (54.6)        | 94(45.4)         | N/A              |
| In a typical week, on how many days do you walk or bicycle for at least 10 minutes continuously to get to and from places? (days/week)                                                                              | N/A               | N/A              | 4.4 (2.0)        |
| How much time do you spend walking or bicycling for travel on a typical day? (hours/day)                                                                                                                            | N/A               | N/A              | 0.5 (0.8)        |
